# Supplementary material
Source: Springer Nature journal article supplement (https://www.springermedizin.de/resource/supplementary/12960_2008_188_MOESM2_ESM.pdf/9570608)

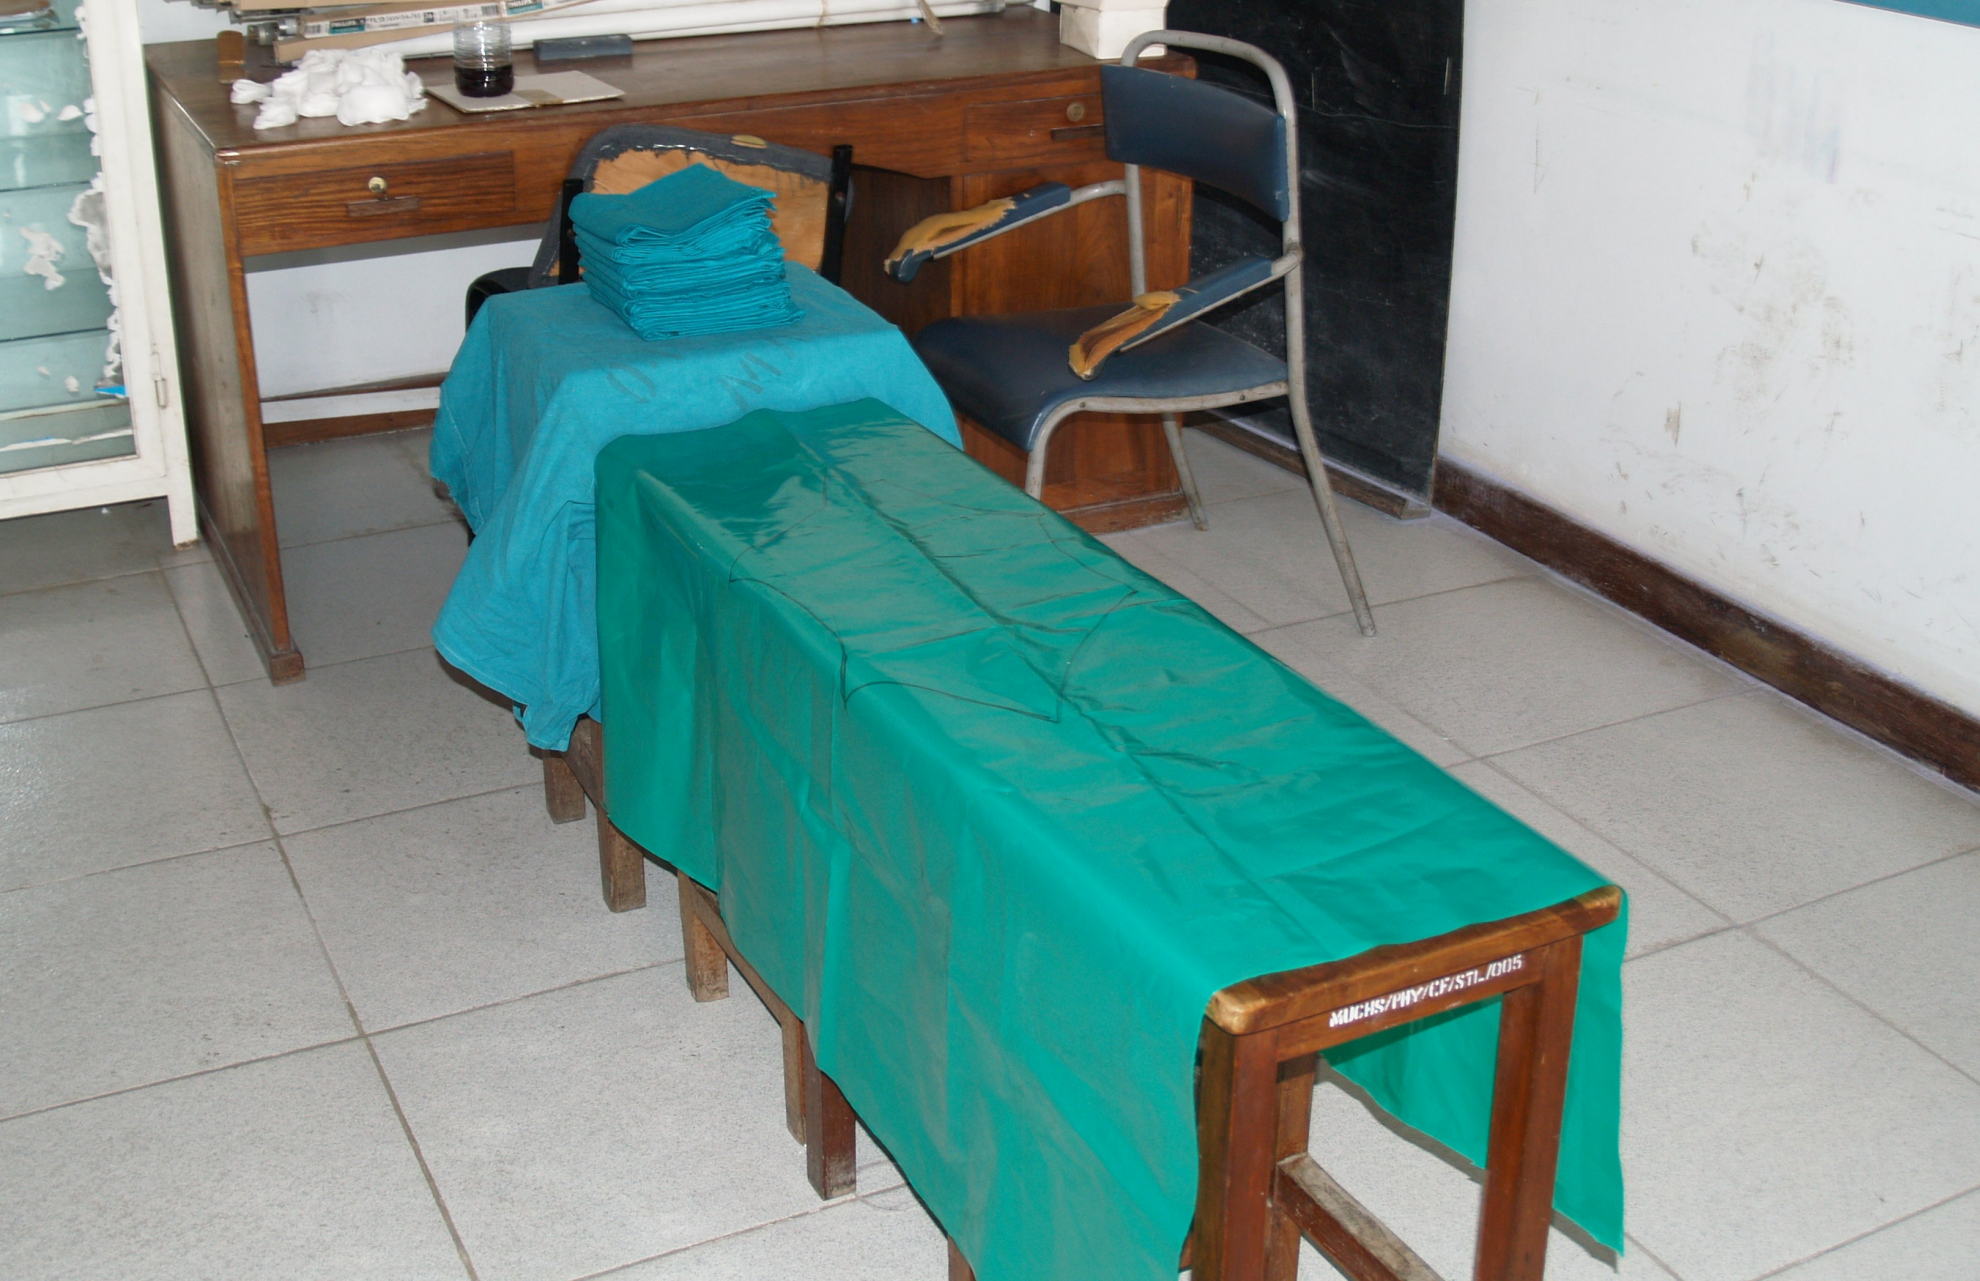

MUCHS/PW/CF/STL/005

Supplement: MOESM2 [file 9570608]
